# Supplementary material for: Predictive and Prognostic Role of Pre-Therapy and Interim 68Ga-DOTATOC PET/CT Parameters in Metastatic Advanced Neuroendocrine Tumor Patients Treated with PRRT
Source: MDPI journal article supplement (doi:10.3390/cancers14030592), 2022-01-25
Supplement: s1 [file s1]

# Supplementary materials: Predictive and Prognostic Role of Pre-Therapy and Interim 68Ga-DOTATOC PET/CT Parameters in Metastatic Advanced Neuroendocrine Tumor Patients Treated with PRRT

Rexhep Durmo, Angelina Filice, Federica Fioroni, Veronica Cervati, Domenico Finocchiaro, Chiara Coruzzi, Giulia Besutti, Silvia Fanello, Andrea Frasoldati and Annibale Versari

**Table S1.** ROC curve analysis for OS.

| Variable     | AUC   | 95%CI          | <i>p</i> | Youden Index | Sens  | Spec  |
|--------------|-------|----------------|----------|--------------|-------|-------|
| SUVmax       | 0.64  | 0.49–0.78      | 0.24     | <22.02       | 57.1  | 82    |
| SUVmean      | 0.656 | 0.501 to 0.789 | 0.1971   | ≤5.45        | 42.86 | 92.31 |
| SUVratio T/S | 0.564 | 0.408 to 0.711 | 0.6552   | ≤1.3161      | 83.33 | 46.15 |
| bTV          | 0.769 | 0.622 to 0.880 | 0.0368   | >244.48      | 85.71 | 79.49 |
| bTLA         | 0.714 | 0.562 to 0.838 | 0.0928   | >2658.62     | 85.71 | 64.10 |
| ΔSUVmax      | 0.740 | 0.590 to 0.858 | 0.0266   | >5.5598      | 85.71 | 74.36 |
| ΔSUVmean     | 0.656 | 0.501 to 0.789 | 0.2530   | >24.4984     | 57.14 | 76.92 |
| ΔSUVratioT/S | 0.590 | 0.433 to 0.734 | 0.5121   | >−0.7501     | 83.33 | 58.97 |
| ΔTV          | 0.557 | 0.403 to 0.703 | 0.6770   | ≤−15.876     | 42.86 | 82.05 |
| ΔTL          | 0.560 | 0.406 to 0.706 | 0.7248   | >80.2123     | 57.14 | 82.05 |
